# Supplementary material for: PandAcuity in paediatrics: a novel clinical measure of visual function based on the panda illusion
Source: PubMed Central journal article supplement — Br J Ophthalmol. 2021 Nov 17;107(4):582–6. doi: 10.1136/bjophthalmol-2021-319935 (PMC10086294; doi:10.1136/bjophthalmol-2021-319935), 2021-11-17
Supplement: bjophthalmol-2021-319935supp001.pdf [file bjophthalmol-2021-319935supp001.pdf]

## **PandAcuity in pediatrics – a novel clinical measure of visual function based on the panda illusion**

Carina Kelbsch<sup>1</sup>, Bettina Spieth<sup>1</sup>, Eberhart Zrenner<sup>2,3</sup>, Dorothea Besch<sup>1</sup>, Torsten Straßer<sup>1,2</sup>

- 1 University Eye Hospital Tuebingen, Center for Ophthalmology, University of Tuebingen, 72076 Tuebingen, Germany
- 2 Institute for Ophthalmic Research, Center for Ophthalmology, University of Tuebingen, 72076 Tuebingen, Germany
- 3 Werner Reichardt Centre for Integrative Neuroscience (CIN), 72076 Tuebingen, Germany

Corresponding author:

Torsten Strasser

Institute for Ophthalmic Research, Centre for Ophthalmology

University of Tuebingen

Elfriede-Aulhorn-Str. 7, 72076 Tuebingen, Germany

torsten.strasser@uni-tuebingen.de

**Supplemental File 1.** Classification of visual impairment according to the visual standards report of the 29th Congress of International Council of Ophthalmology<sup>9</sup>

| VA (decimal) | VA (logMAR) | Snellen equivalent | Vision impairment |
|--------------|-------------|--------------------|-------------------|
| > 0.8        | < 0.1       | > 20/25            | None              |
| 0.5 – 0.8    | 0.1 – 0.3   | 20/25 – 20/40      | Minimal           |
| 0.32 – 0.5   | 0.3 – 0.5   | 20/40 – 20/63      | Mild              |
| 0.125 – 0.32 | 0.5 – 0.9   | 20/63 – 20/160     | Moderate          |
| 0.05 – 0.125 | 0.9 – 1.3   | 20/160 – 20/400    | Severe            |
| < 0.05       | > 1.3       | < 20/400           | Profound          |

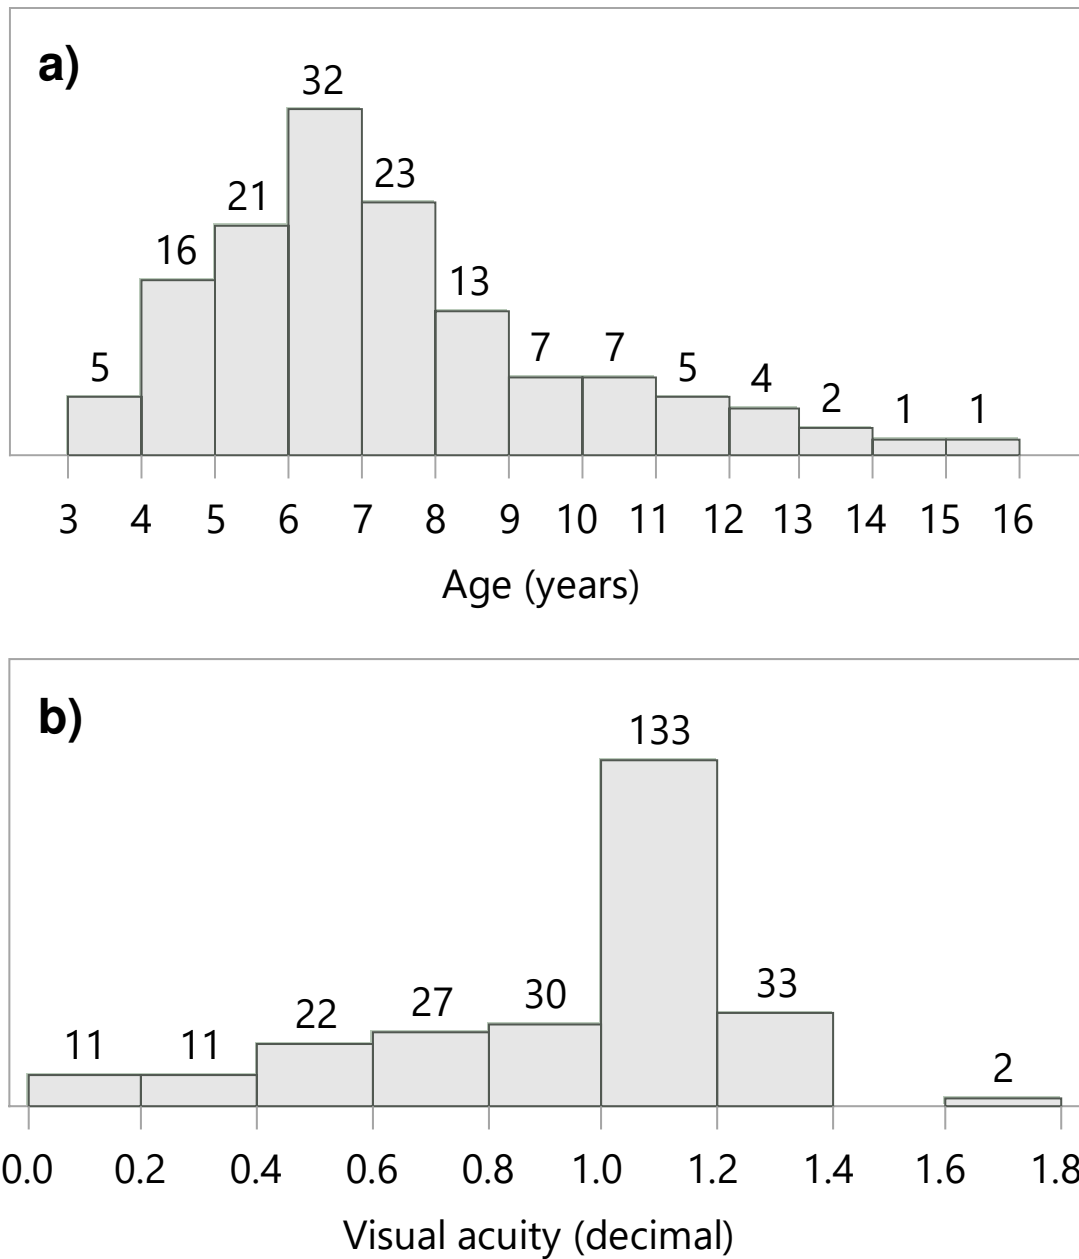

**Supplemental File 2.** Distribution of the included 137 children a) age and b) visual acuity of the 269 eyes

**Supplemental File 3.** Confusion matrix of the binary logistic regression predicting a visual impairment based on the averaged PandAcuity score

| Visual impairment<br>observed | Actual | Visual impairment<br>predicted from PandAcuity |     |
|-------------------------------|--------|------------------------------------------------|-----|
|                               |        | yes                                            | No  |
| yes                           | 71     | 48                                             | 23  |
| no                            | 198    | 24                                             | 174 |

Visual impairment: VA < 0.8 (decimal)

**Supplemental File 4.** Results of nine children with nystagmus. The PandAcuity score was calculated as the average of the first and second threshold determinations of the test and the prediction was determined according to the workflow depicted in Figure 2. The agreement between the classifications is based on the difference of the classification (1 step = almost equal, 2 steps = similar, 3 steps different, 4 steps very different)

| Participant |    | PandAcuity<br>(decimal) | VA<br>(decimal) | Prediction | Visual impairment‡ |          | Agreement      |
|-------------|----|-------------------------|-----------------|------------|--------------------|----------|----------------|
|             |    |                         |                 |            | PandAcuity         | VA       |                |
| Pan13       | OD | ≤ 0.6*                  | 1.0             | incorrect  | minimal            | none     | almost equal   |
|             | OS | ≤ 0.4†                  | 1.0             | incorrect  | mild               | none     | similar        |
| Pan30       | OD | ≤ 0.6†                  | 0.3             | correct    | minimal            | moderate | similar        |
|             | OS | ≤ 0.6†                  | 0.03            | correct    | minimal            | profound | very different |
| Pan43       | OD | ≤ 0.4†                  | 0.4             | correct    | mild               | mild     | equal          |
|             | OS | ≤ 0.4†                  | 0.4             | correct    | mild               | mild     | equal          |
| Pan44       | OD | ≤ 0.4†                  | 0.4             | correct    | mild               | mild     | equal          |
| Pan54       | OD | ≥ 1.25‡                 | 0.8             | correct    | none               | none     | equal          |
|             | OS | 1.12‡                   | 0.8             | correct    | none               | none     | equal          |
| Pan57       | OD | ≤ 0.4†                  | 0.16            | correct    | mild               | moderate | almost equal   |
| Pan116      | OD | ≤ 0.4†                  | 0.3             | correct    | mild               | moderate | almost equal   |
|             | OS | ≤ 0.4†                  | 0.3             | correct    | mild               | moderate | almost equal   |
| Pan117      | OD | ≤ 0.4†                  | 0.5             | correct    | mild               | minimal  | almost equal   |
|             | OS | ≤ 0.4†                  | 0.5             | correct    | mild               | minimal  | almost equal   |
| Pan126      | OD | ≤ 0.4†                  | 0.05            | correct    | mild               | profound | different      |
|             | OS | ≤ 0.4†                  | 0.2             | correct    | mild               | moderate | almost equal   |

\*Test-set high (0.6 – 1.6); †Test-set low (0.4 – 1.25); ‡Classification according to ICO<sup>9</sup>. VA = visual acuity by conventional tests

**Supplemental File 5.** Results of seven developmentally delayed children or those with intellectual disabilities. The PandAcuity score was calculated as the average of the first and second measurements of the test and the prediction was determined according to the workflow depicted in Figure 2. The agreement between the classifications is based on the difference of the classification (1 step = almost equal, 2 steps = similar, 3 steps different, 4 steps very different)

| Participant                        |    | PandAcuity<br>(decimal) | VA<br>(decimal) | Prediction | Visual impairment‡ |          | Agreement    |
|------------------------------------|----|-------------------------|-----------------|------------|--------------------|----------|--------------|
|                                    |    |                         |                 |            | PandAcuity         | VA       |              |
| Pan34                              | OD | ≤ 0.6*                  | 0.5             | correct    | minimal            | minimal  | equal        |
| Joubert-<br>Syndrome               | OS | ≤ 0.6*                  | 0.5             | correct    | minimal            | minimal  | equal        |
| Pan40                              | OD | ≤ 0.6*                  | 0.5             | correct    | minimal            | minimal  | equal        |
| Trisomy 21                         | OS | ≤ 0.6*                  | 0.4             | correct    | minimal            | mild     | almost equal |
| Pan49                              | OD | ≤ 0.4†                  | 0.16            | correct    | mild               | moderate | almost equal |
| Williams-<br>Beuren-<br>Syndrome   | OS | ≤ 0.4†                  | 0.1             | correct    | mild               | severe   | similar      |
| Pan79                              | OD | ≤ 0.6*                  | 0.63            | correct    | minimal            | minimal  | equal        |
| Cerebral<br>paresis                | OS | ≤ 0.6*                  | 0.63            | correct    | minimal            | minimal  | equal        |
| Pan105                             | OD | ≤ 0.6*                  | 0.3             | correct    | minimal            | moderate | similar      |
| Microdeletion<br>syndrome          | OS | ≤ 0.6*                  | 0.25            | correct    | minimal            | moderate | similar      |
| Pan141                             | OD | ≥ 1.6*                  | 1.0             | correct    | none               | none     | equal        |
| Beckwith-<br>Wiedemann<br>Syndrome | OS | 1.13*                   | 1.0             | correct    | none               | none     | equal        |
| Pan149                             | OD | ≥ 1.6*                  | 1.0             | correct    | none               | none     | equal        |
| Intellectually<br>disabled         | OS | ≥ 1.6*                  | 1.0             | correct    | none               | none     | equal        |

\*Test-set high (0.6 – 1.6); †Test-set low (0.4 – 1.25); ‡Classification according to ICO<sup>9</sup>. VA = visual acuity by conventional tests
